# Supplementary material
Source: HighWire-hosted journal article supplement (https://www.annfammed.org/highwire/filestream/7558/field_highwire_adjunct_files/0/Shields_Sup_Table_1-3.pdf)
Supplement: Shields_Sup_Table_1-3.pdf [file Shields_Sup_Table_1-3.pdf]

Online Supplementary Material

Shields CG, Franks P, Fiscella K, Meldrum SC, Epstein RM. Rochester participatory decision-making scale (RPAD): reliability and validity. *Ann Fam Med*. 2005;3:436-443.

<http://www.annfammed.org/cgi/content/full/3/5/436/DC1>

**Supplemental Table 1. Characteristics of Patients In Sample**

| Health Status                                                                                                   | Percent Reporting |
|-----------------------------------------------------------------------------------------------------------------|-------------------|
| Hypertension                                                                                                    | 0.25              |
| Myocardial infarction                                                                                           | 0.00              |
| Congestive heart failure                                                                                        | 0.01              |
| Diabetes                                                                                                        | 0.08              |
| Angina                                                                                                          | 0.02              |
| Arthritis                                                                                                       | 0.11              |
| Back pain, sciatica                                                                                             | 0.10              |
| Liver disease                                                                                                   | 0.00              |
| Ulcers                                                                                                          | 0.12              |
| Depression                                                                                                      | 0.23              |
| Blindness                                                                                                       | 0.06              |
| Deafness                                                                                                        | 0.07              |
| Limited mobility                                                                                                | 0.13              |
|                                                                                                                 | <b>Mean (SD)</b>  |
| Self-reported health status from the SF-12                                                                      |                   |
| PCS-12                                                                                                          | 45.97 (11.07)     |
| MCS-12                                                                                                          | 48.75 (10.51)     |
| SF-12 = Short Form – 12 Health Survey; PCS-12 = physical component summary; MCS-12 = medical component summary. |                   |

**Supplemental Table 2. Regressions of Patient Surveys on RPAD and MPCC Components**

| Dependent Variable             | 95% Confidence Interval |        |         |                |
|--------------------------------|-------------------------|--------|---------|----------------|
|                                | $\beta$                 | Lower  | Upper   | <i>P</i> Value |
| <b>HCCQ – autonomy support</b> |                         |        |         |                |
| RPAD only                      |                         |        |         |                |
| RPAD total                     | 0.072                   | 0.015  | - 0.13  | .0140*         |
| RPAD & MPCC                    |                         |        |         |                |
| RPAD total                     | 0.054                   | -0.002 | - 0.110 | .0590†         |
| MPCC C1 – disease and illness  | 0.093                   | 0.033  | - 0.153 | .0027‡         |
| MPCC C2 – whole person         | -0.045                  | -0.104 | - 0.014 | .1345          |
| <b>PCAS – knowledge</b>        |                         |        |         |                |
| RPAD only                      |                         |        |         |                |
| RPAD Total                     | 0.061                   | 0.001  | - 0.122 | .0455*         |
| RPAD & MPCC                    |                         |        |         |                |
| RPAD total                     | 0.041                   | -0.018 | - 0.101 | .1683          |
| MPCC C1 – disease and illness  | 0.094                   | 0.031  | - 0.157 | .0039‡         |
| MPCC C2 – whole person         | -0.022                  | -0.084 | - 0.040 | .4858          |
| <b>PCAS – trust</b>            |                         |        |         |                |
| RPAD only                      |                         |        |         |                |
| RPAD total                     | 0.059                   | -0.001 | - 0.120 | .0552†         |
| RPAD & MPCC                    |                         |        |         |                |
| RPAD total                     | 0.043                   | -0.018 | - 0.103 | .1634          |
| MPCC C1 – disease and illness  | 0.081                   | 0.017  | - 0.146 | .0137*         |
| MPCC C2 – whole person         | -0.032                  | -0.095 | - 0.031 | .3199          |
| <b>Satisfaction</b>            |                         |        |         |                |
| RPAD only                      |                         |        |         |                |
| RPAD total                     | 0.061                   | -0.001 | - 0.124 | .0545†         |
| RPAD & MPCC                    |                         |        |         |                |
| RPAD total                     | 0.048                   | -0.015 | - 0.111 | .1369          |
| MPCC C1 – disease and illness  | 0.067                   | -0.000 | - 0.134 | .0507†         |
| MPCC C2 – whole person         | -0.025                  | -0.091 | 0.041   | .4588          |

RPAD = Rochester Participatory Decision-Making Scale; MPCC = Measure of Patient-Centered Communication; C1, C2 = Component 1, Component 2; PCAS = Primary Care Assessment Survey.

\*  $P \leq .05$ .

†  $P < .10$ .

‡  $P \leq .005$ .

**Supplemental Table 3. Regressions of Standardized Patient Surveys on RPAD and MPCC Components**

| Dependent Variable                                                                                                                                                                | 95% Confidence Interval |        |         |                |
|-----------------------------------------------------------------------------------------------------------------------------------------------------------------------------------|-------------------------|--------|---------|----------------|
|                                                                                                                                                                                   | $\beta$                 | Lower  | Upper   | <i>P</i> Value |
| <b>HCCQ – autonomy support</b>                                                                                                                                                    |                         |        |         |                |
| RPAD only                                                                                                                                                                         |                         |        |         |                |
| RPAD total                                                                                                                                                                        | 0.324                   | 0.194  | - 0.454 | < .0001*       |
| RPAD & MPCC                                                                                                                                                                       |                         |        |         |                |
| RPAD total                                                                                                                                                                        | 0.303                   | 0.172  | - 0.434 | < .0001*       |
| MPCC C1 – disease and illness                                                                                                                                                     | 0.112                   | -0.005 | - 0.228 | .0600†         |
| MPCC C2 – whole person                                                                                                                                                            | -0.009                  | -0.124 | - 0.106 | .8786          |
| <b>PCAS – trust</b>                                                                                                                                                               |                         |        |         |                |
| RPAD only                                                                                                                                                                         |                         |        |         |                |
| RPAD total                                                                                                                                                                        | 0.283                   | 0.165  | - 0.401 | < .0001*       |
| RPAD & MPCC                                                                                                                                                                       |                         |        |         |                |
| RPAD total                                                                                                                                                                        | 0.256                   | 0.139  | - 0.373 | < .0001*       |
| MPCC C1 – disease and illness                                                                                                                                                     | 0.147                   | 0.039  | - 0.255 | .0081‡         |
| MPCC C2 – whole person                                                                                                                                                            | -0.012                  | -0.118 | - 0.095 | .8282          |
| RPAD = Rochester Participatory Decision-Making Scale; MPCC = Measure of Patient-Centered Communication; C1, C2 = Component 1, Component 2; PCAS = Primary Care Assessment Survey. |                         |        |         |                |
| * <i>P</i> ≤.005.                                                                                                                                                                 |                         |        |         |                |
| † <i>P</i> < .10.                                                                                                                                                                 |                         |        |         |                |
| ‡ <i>P</i> ≤.05.                                                                                                                                                                  |                         |        |         |                |
